# Supplementary material
Source: PubMed Central journal article supplement (PMC2711746)
Supplement: 01278.2008_1.pdf [file 01278.2008_1.pdf]

**Supplemental Table 1.** List of mitochondrial proteins identified from the myocardium of sedentary and exercise trained rats. Score, percentage of coverage (%Cov) and number of unique peptides for each protein indicated in the tables are from the replicate showing the highest score when detected in multiple replicates.

| Score  | %Cov | Accession # | # Unique Peptides | Protein Name                                                                                             | # of Rep |
|--------|------|-------------|-------------------|----------------------------------------------------------------------------------------------------------|----------|
| 189.3  | 65.2 | IPI00189809 | 87                | Myh6 Myosin-6                                                                                            | 4        |
| 180.15 | 85.8 | IPI00551812 | 63                | Atp5b ATP synthase subunit beta, mitochondrial precursor                                                 | 4        |
| 171.75 | 66.6 | IPI00189811 | 77                | Myh7 Myosin-7                                                                                            | 4        |
| 111.54 | 78.3 | IPI00396910 | 58                | Atp5a1 ATP synthase subunit alpha, mitochondrial precursor                                               | 4        |
| 89.49  | 71.3 | IPI00358033 | 41                | Ndufs1 NADH-ubiquinone oxidoreductase 75 kDa subunit, mitochondrial precursor                            | 4        |
| 77.73  | 81.5 | IPI00231927 | 30                | Slc25a4 ADP/ATP translocase 1                                                                            | 4        |
| 72.3   | 73.1 | IPI00471577 | 37                | Uqcrc1 Ubiquinol-cytochrome-c reductase complex core protein 1, mitochondrial precursor                  | 4        |
| 70.72  | 43.3 | IPI00555265 | 29                | Nnt Nicotinamide nucleotide transhydrogenase                                                             | 4        |
| 62.47  | 70.6 | IPI00188924 | 23                | Uqcrc2 Ubiquinol-cytochrome-c reductase complex core protein 2, mitochondrial precursor                  | 4        |
| 60.81  | 69.5 | IPI00213057 | 32                | Acadv1 Very long-chain specific acyl-CoA dehydrogenase, mitochondrial precursor                          | 4        |
| 59.56  | 56.5 | IPI00188989 | 28                | Acs11 Long-chain-fatty-acid--CoA ligase 1                                                                | 4        |
| 56.89  | 51.8 | IPI00212622 | 26                | Hadha Trifunctional enzyme subunit alpha, mitochondrial precursor                                        | 4        |
| 56.5   | 57.6 | IPI00421539 | 29                | Aco2 Aconitate hydratase, mitochondrial precursor                                                        | 4        |
| 55.3   | 80.2 | IPI00200466 | 22                | Slc25a5 ADP/ATP translocase 2                                                                            | 3        |
| 54.52  | 51.5 | IPI00215093 | 27                | LOC360975 2-oxoglutarate dehydrogenase E1 component, mitochondrial precursor                             | 4        |
| 52.85  | 48.6 | IPI00476111 | 24                | Myh4 Myosin-4                                                                                            | 1        |
| 52.18  | 62.8 | IPI00193485 | 24                | LOC361596 Isocitrate dehydrogenase [NADP], mitochondrial precursor                                       | 4        |
| 52.08  | 48.2 | IPI00567268 | 22                | Sdha 72 kDa protein                                                                                      | 4        |
| 45.98  | 59.6 | IPI00471868 | 24                | Etfdh Electron-transferring-flavoprotein dehydrogenase                                                   | 4        |
| 43.77  | 82.0 | IPI00230838 | 19                | Atp5h ATP synthase D chain, mitochondrial                                                                | 4        |
| 41.97  | 68.5 | IPI00192246 | 15                | Cox5a Cytochrome c oxidase subunit 5A, mitochondrial precursor                                           | 4        |
| 41.92  | 68.3 | IPI00197696 | 19                | Mdh2 Malate dehydrogenase, mitochondrial precursor                                                       | 4        |
| 41.62  | 55.8 | IPI00188313 | 19                | Ckmt2 Creatine kinase, sarcomeric mitochondrial precursor                                                | 4        |
| 40.43  | 72.8 | IPI00195123 | 18                | Atp5o ATP synthase O subunit, mitochondrial precursor                                                    | 4        |
| 40.1   | 60.7 | IPI00366416 | 16                | Cyc1_predicted similar to cytochrome c-1                                                                 | 4        |
| 39.79  | 55.6 | IPI00198467 | 16                | Hadhb Trifunctional enzyme subunit beta, mitochondrial precursor                                         | 4        |
| 39.42  | 60.3 | IPI00471647 | 20                | Ndufs2 NADH dehydrogenase (Ubiquinone) Fe-S protein 2                                                    | 4        |
| 38.67  | 65.7 | IPI00204316 | 10                | Atp5j ATP synthase-coupling factor 6, mitochondrial precursor                                            | 4        |
| 38.65  | 44.2 | IPI00191737 | 19                | Alb Serum albumin precursor                                                                              | 4        |
| 37.67  | 48.0 | IPI00358441 | 18                | Ndufa9 similar to NADH dehydrogenase (ubiquinone) 1 alpha subcomplex, 9                                  | 4        |
| 37.11  | 61.0 | IPI00191913 | 19                | Ndufv1 NADH dehydrogenase (Ubiquinone) flavoprotein 1                                                    | 4        |
| 36.91  | 70.8 | IPI00198620 | 13                | Atp5d ATP synthase delta chain, mitochondrial precursor                                                  | 4        |
| 35.03  | 46.1 | IPI00363265 | 17                | Hspa9a_predicted Stress-70 protein, mitochondrial precursor                                              | 4        |
| 34.58  | 49.7 | IPI00777695 | 17                | Immt 87 kDa protein                                                                                      | 4        |
| 33.6   | 62.6 | IPI00734686 | 12                | mt-Co2 cytochrome c oxidase subunit II                                                                   | 4        |
| 33.55  | 63.1 | IPI00362949 | 17                | Uqcrcs1 Ubiquinol-cytochrome c reductase iron-sulfur subunit, mitochondrial precursor                    | 4        |
| 33.43  | 55.1 | IPI00210920 | 16                | Got2 Aspartate aminotransferase, mitochondrial precursor                                                 | 4        |
| 33.01  | 70.5 | IPI00202616 | 14                | Ndufs3_predicted similar to NADH dehydrogenase (ubiquinone) Fe-S protein 3                               | 4        |
| 32.79  | 45.3 | IPI00211225 | 17                | Acadl Long-chain specific acyl-CoA dehydrogenase, mitochondrial precursor                                | 4        |
| 31.64  | 70.0 | IPI00421874 | 16                | Vdac1 Voltage-dependent anion-selective channel protein 1                                                | 4        |
| 29.47  | 33.9 | IPI00196647 | 15                | Cpt1b Carnitine O-palmitoyltransferase I, muscle isoform                                                 | 4        |
| 29.23  | 34.1 | IPI00202370 | 14                | Maoa similar to Amine oxidase [flavin-containing] A                                                      | 4        |
| 28.62  | 27.8 | IPI00454288 | 14                | Atp5c1 ATP synthase gamma chain                                                                          | 4        |
| 28.41  | 41.0 | IPI00206977 | 14                | Cs Citrate synthase, mitochondrial precursor                                                             | 4        |
| 28.12  | 44.3 | IPI00209115 | 13                | Slc25a3 Slc25a3 protein                                                                                  | 4        |
| 27.87  | 68.8 | IPI00211756 | 13                | Phb Prohibitin                                                                                           | 4        |
| 27.57  | 65.4 | IPI00561513 | 13                | LOC678759;Ndufa10 NADH dehydrogenase [ubiquinone] 1 alpha subcomplex subunit 10, mitochondrial precursor | 4        |

|       |      |             |    |                                                                                                                                |   |
|-------|------|-------------|----|--------------------------------------------------------------------------------------------------------------------------------|---|
| 27.06 | 44.9 | IPI00765153 | 13 | Dlat similar to dihydrolipoamide S-acetyltransferase                                                                           | 4 |
| 26.96 | 53.6 | IPI00197129 | 12 | Acta2 Actin, aortic smooth muscle                                                                                              | 2 |
| 26.02 | 54.3 | IPI00208288 | 13 | Sdhb_predicted similar to succinate dehydrogenase Ip subunit                                                                   | 4 |
| 25.81 | 64.5 | IPI00231788 | 10 | Myl3 Myosin light polypeptide 3                                                                                                | 4 |
| 25.79 | 64.5 | IPI00568360 | 12 | RGD1564131_predicted similar to solute carrier family 25, member 5                                                             | 1 |
| 25.38 | 41.7 | IPI00205018 | 14 | Aldh6a1 Methylmalonate-semialdehyde dehydrogenase [acylating], mitochondrial precursor                                         | 4 |
| 25.18 | 63.9 | IPI00194222 | 12 | Cox4i1 Cytochrome c oxidase subunit 4 isoform 1, mitochondrial precursor                                                       | 4 |
| 25.12 | 37.7 | IPI00195593 | 13 | Cpt2 Carnitine O-palmitoyltransferase 2, mitochondrial precursor                                                               | 4 |
| 24.11 | 56.7 | IPI00201413 | 11 | Acaa2 3-ketoacyl-CoA thiolase, mitochondrial                                                                                   | 4 |
| 24.1  | 50.8 | IPI00768086 | 12 | Pdha1 Pyruvate dehydrogenase E1 alpha 1                                                                                        | 4 |
| 23.88 | 39.6 | IPI00358163 | 11 | RGD1565889_predicted similar to Calcium-binding mitochondrial carrier protein Aralar2                                          | 4 |
| 23.71 | 47.3 | IPI00193918 | 9  | Cox5b Cytochrome c oxidase subunit 5B, mitochondrial precursor                                                                 | 4 |
| 23.59 | 38.8 | IPI00551702 | 13 | Dlst Dihydrolipoylysine-residue succinyltransferase component of 2-oxoglutarate dehydrogenase complex, mitochondrial precursor | 4 |
| 23.13 | 42.4 | IPI00194087 | 11 | Actc1 Actin, alpha cardiac muscle 1                                                                                            | 2 |
| 22.31 | 57.1 | IPI00191112 | 9  | Ndufab1_predicted similar to Acyl carrier protein, mitochondrial precursor                                                     | 4 |
| 21.98 | 50.4 | IPI00194324 | 10 | Pdhb Pyruvate dehydrogenase E1 component subunit beta, mitochondrial precursor                                                 | 4 |
| 21.76 | 42.9 | IPI00766788 | 11 | LOC678860 similar to 3-oxoacid CoA transferase 1 isoform 2                                                                     | 4 |
| 21.11 | 65.9 | IPI00204641 | 9  | Ndufb9_predicted similar to NADH dehydrogenase (ubiquinone) 1 beta subcomplex, 9                                               | 4 |
| 21.1  | 60.2 | IPI00196107 | 10 | Atp5f1 ATP synthase B chain, mitochondrial precursor                                                                           | 4 |
| 20.44 | 26.5 | IPI00365545 | 11 | Dld Dihydrolipoyl dehydrogenase, mitochondrial precursor                                                                       | 4 |
| 20.01 | 22.0 | IPI00798619 | 10 | Opa1 Isoform 2 of Dynamin-like 120 kDa protein, mitochondrial precursor                                                        | 4 |
| 19.55 | 44.6 | IPI00231261 | 10 | Slc25a11 Mitochondrial 2-oxoglutarate/malate carrier protein                                                                   | 4 |
| 19.25 | 50.4 | IPI00367152 | 8  | Ndufv2 NADH dehydrogenase [ubiquinone] flavoprotein 2, mitochondrial precursor                                                 | 4 |
| 19.02 | 62.5 | IPI00202238 | 10 | LOC681867;LOC681418 similar to NADH-ubiquinone oxidoreductase PDSW subunit (Complex I-PDSW) (CI-PDSW) isoform 1                | 4 |
| 18.1  | 63.1 | IPI00201307 | 8  | LOC690049;Uqcrb_predicted;LOC687741 similar to ubiquinol-cytochrome c reductase binding protein                                | 4 |
| 18.06 | 42.0 | IPI00198327 | 7  | Vdac2 Voltage-dependent anion-selective channel protein 2                                                                      | 4 |
| 17.97 | 32.4 | IPI00564348 | 9  | RGD1561141_predicted 72 kDa protein                                                                                            | 2 |
| 17.74 | 77.6 | IPI00231997 | 9  | Ndufa5 NADH dehydrogenase [ubiquinone] 1 alpha subcomplex subunit 5                                                            | 4 |
| 17.7  | 64.0 | IPI00369093 | 3  | Uqcrh Ubiquinol-cytochrome c reductase complex 11 kDa protein, mitochondrial precursor                                         | 4 |
| 17.59 | 39.9 | IPI00324302 | 9  | Acat1 Acetyl-CoA acetyltransferase, mitochondrial precursor                                                                    | 4 |
| 16.94 | 45.7 | IPI00370372 | 7  | Ndufb8_predicted similar to NADH dehydrogenase (ubiquinone) 1 beta subcomplex 8                                                | 4 |
| 16.56 | 44.8 | IPI00764461 | 8  | Actg1 similar to Actin, cytoplasmic 2                                                                                          | 4 |
| 16.4  | 69.1 | IPI00212052 | 8  | Ndufs4 NADH dehydrogenase [ubiquinone] iron-sulfur protein 4, mitochondrial precursor                                          | 4 |
| 16.38 | 43.6 | IPI00557327 | 4  | Ndufa8 20 kDa protein                                                                                                          | 4 |
| 16.04 | 27.1 | IPI00326305 | 8  | Atp1a1 Sodium/potassium-transporting ATPase subunit alpha-1 precursor                                                          | 4 |
| 15.81 | 31.8 | IPI00339148 | 8  | Hspd1 60 kDa heat shock protein, mitochondrial precursor                                                                       | 4 |
| 15.69 | 49.5 | IPI00188330 | 8  | Ndufs8_predicted similar to NADH dehydrogenase (ubiquinone) Fe-S protein 8                                                     | 4 |
| 15.5  | 55.2 | IPI00389231 | 7  | LOC679739;LOC692052 NADH dehydrogenase (ubiquinone) Fe-S protein 6                                                             | 4 |
| 15.23 | 32.2 | IPI00197770 | 8  | Aldh2 Aldehyde dehydrogenase, mitochondrial precursor                                                                          | 4 |
| 14.98 | 44.5 | IPI00190557 | 8  | Phb2 Prohibitin-2                                                                                                              | 4 |
| 14.92 | 56.2 | IPI00362298 | 6  | LOC690675;LOC684936 similar to Cytochrome c, somatic                                                                           | 4 |
| 14.82 | 41.5 | IPI00197888 | 7  | Tpm1 Isoform 1 of Tropomyosin alpha-1 chain                                                                                    | 2 |
| 14.55 | 35.4 | IPI00388687 | 7  | RGD1561141_predicted similar to solute carrier family 25 (mitochondrial carrier, Aralar), member 12                            | 2 |
| 14.24 | 30.2 | IPI00205413 | 7  | Slc25a20 Mitochondrial carnitine/acylcarnitine carrier protein                                                                 | 4 |
| 14    | 37.4 | IPI00231359 | 7  | Acads Acetyl-Coenzyme A dehydrogenase, short chain                                                                             | 4 |
| 13.7  | 23.2 | IPI00204118 | 7  | Pdcd8 Apoptosis-inducing factor 1, mitochondrial precursor                                                                     | 4 |
| 13.66 | 50.0 | IPI00189203 | 6  | RGD1309529_predicted similar to Protein C10orf70                                                                               | 4 |
| 13.54 | 39.2 | IPI00556929 | 7  | Vdac3 Isoform 1 of Voltage-dependent anion-selective channel protein 3                                                         | 4 |
| 13.35 | 69.5 | IPI00213436 | 7  | LOC679503;LOC681024 similar to NADH-ubiquinone oxidoreductase MLRQ subunit                                                     | 4 |
| 13.25 | 54.6 | IPI00366206 | 6  | Ndufa12_predicted similar to 13kDa differentiation-associated protein                                                          | 4 |
| 13.16 | 20.8 | IPI00734781 | 8  | mt-Nd1 NADH dehydrogenase subunit 1                                                                                            | 3 |

|       |      |             |   |                                                                                                                |   |
|-------|------|-------------|---|----------------------------------------------------------------------------------------------------------------|---|
| 13.15 | 58.4 | IPI00365170 | 7 | Ndufb7_predicted similar to NADH dehydrogenase (ubiquinone) 1 beta subcomplex, 7                               | 4 |
| 12.7  | 57.4 | IPI00205332 | 6 | Etfa Electron transfer flavoprotein subunit alpha, mitochondrial precursor                                     | 4 |
| 12.45 | 23.3 | IPI00231369 | 8 | Atp2a2 Isoform SERCA2A of Sarcoplasmic/endoplasmic reticulum calcium ATPase 2                                  | 4 |
| 12.36 | 46.8 | IPI00365962 | 6 | Ndufs7 NADH dehydrogenase (Ubiquinone) Fe-S protein 7                                                          | 4 |
| 12.12 | 45.8 | IPI00195860 | 5 | LOC679008;Cox7a2;LOC688386 Cytochrome c oxidase polypeptide VIIa-liver/heart, mitochondrial precursor          | 4 |
| 12    | 35.3 | IPI00364321 | 6 | Etfb Electron transfer flavoprotein subunit beta                                                               | 4 |
| 11.5  | 30.1 | IPI00421763 | 2 | Try10 Trypsin 10 precursor                                                                                     | 1 |
| 11.44 | 74.3 | IPI00362610 | 5 | - 17 kDa protein                                                                                               | 4 |
| 11.43 | 27.2 | IPI00212767 | 2 | Prss1 Anionic trypsin-1 precursor                                                                              | 4 |
| 11.4  | 39.0 | IPI00372941 | 6 | Samm50 Sorting and assembly machinery component 50 homolog                                                     | 4 |
| 11.08 | 44.1 | IPI00394488 | 6 | LOC498174 Similar to NipSnap2 protein                                                                          | 4 |
| 11.05 | 64.3 | IPI00768953 | 4 | LOC687571 similar to cytochrome c oxidase, subunit VIb polypeptide 1                                           | 4 |
| 10.97 | 36.3 | IPI00480620 | 6 | Bdh1 3-hydroxybutyrate dehydrogenase, type 1                                                                   | 4 |
| 10.59 | 29.4 | IPI00231611 | 6 | Fh1 Isoform Mitochondrial of Fumarate hydratase, mitochondrial precursor                                       | 4 |
| 10.52 | 21.1 | IPI00778978 | 4 | Slc4a1 Isoform Kidney of Band 3 anion transport protein                                                        | 4 |
| 10.45 | 26.3 | IPI00777899 | 6 | Mte1 50 kDa protein                                                                                            | 4 |
| 10.32 | 40.8 | IPI00198897 | 5 | Ndufa6_predicted similar to NADH dehydrogenase (ubiquinone) 1 alpha subcomplex, 6                              | 4 |
| 10.29 | 23.2 | IPI00371236 | 5 | Tufm_predicted similar to Tu translation elongation factor, mitochondrial                                      | 4 |
| 10.29 | 58.3 | IPI00421711 | 5 | MGC72942 Similar to CG6105-PA                                                                                  | 4 |
| 10.15 | 68.2 | IPI00199169 | 5 | Ndufb4 NADH dehydrogenase (ubiquinone) 1 beta subcomplex, 4, 15kDa                                             | 4 |
| 10.03 | 24.8 | IPI00205157 | 6 | Hadhsc Hydroxyacyl-coenzyme A dehydrogenase, mitochondrial precursor                                           | 4 |
| 10.02 | 15.0 | IPI00734722 | 4 | mt-Co1 cytochrome c oxidase subunit I                                                                          | 3 |
| 10    | 54.4 | IPI00230897 | 5 | Hbb Hemoglobin subunit beta-1                                                                                  | 3 |
| 10    | 39.4 | IPI00203604 | 5 | Brp44l Brain protein 44-like protein                                                                           | 4 |
| 9.72  | 54.3 | IPI00365897 | 6 | Ndufb11_predicted similar to NADH-ubiquinone oxidoreductase ESSS subunit, mitochondrial precursor              | 4 |
| 9.7   | 46.0 | IPI00372179 | 5 | Ndufb5_predicted similar to NADH dehydrogenase (ubiquinone) 1 beta subcomplex, 5                               | 4 |
| 9.69  | 47.7 | IPI00211593 | 5 | Sod2 Superoxide dismutase [Mn], mitochondrial precursor                                                        | 4 |
| 8.86  | 17.3 | IPI00364777 | 4 | Letm1 Leucine zipper-EF-hand-containing transmembrane protein 1, mitochondrial precursor                       | 4 |
| 8.61  | 27.6 | IPI00372027 | 5 | Chchd3_predicted similar to coiled-coil-helix-coiled-coil-helix domain containing 3                            | 4 |
| 8.52  | 23.7 | IPI00361208 | 4 | RGD1562778_predicted Tripartite motif-containing protein 72                                                    | 3 |
| 8.42  | 66.1 | IPI00191312 | 5 | Ndufa7_predicted similar to NADH dehydrogenase (ubiquinone) 1 alpha subcomplex, 7                              | 3 |
| 8.29  | 62.0 | IPI00231978 | 4 | Atp5i ATP synthase e chain, mitochondrial                                                                      | 4 |
| 8.25  | 25.1 | IPI00198720 | 4 | Idh3a Isocitrate dehydrogenase [NAD] subunit alpha, mitochondrial precursor                                    | 3 |
| 8.2   | 38.1 | IPI00364431 | 5 | Sucla2_predicted similar to succinate-Coenzyme A ligase, ADP-forming, beta subunit                             | 4 |
| 8.07  | 54.8 | IPI00214000 | 4 | Myl2 Myosin regulatory light chain 2, ventricular/cardiac muscle isoform                                       | 4 |
| 8     | 37.0 | IPI00201300 | 4 | Ptrf_predicted Polymerase I and transcript release factor                                                      | 4 |
| 8     | 13.4 | IPI00231746 | 4 | Gja1 Gap junction alpha-1 protein                                                                              | 2 |
| 7.89  | 31.0 | IPI00231253 | 6 | Hadh2 3-hydroxyacyl-CoA dehydrogenase type-2                                                                   | 4 |
| 7.85  | 55.7 | IPI00561751 | 5 | Ndufs5b NADH dehydrogenase (ubiquinone) Fe-S protein 5b                                                        | 4 |
| 7.71  | 30.7 | IPI00205394 | 4 | Timm44 Import inner membrane translocase subunit TIM44, mitochondrial precursor                                | 4 |
| 7.54  | 29.4 | IPI00215574 | 3 | Dci 3,2-trans-enoyl-CoA isomerase, mitochondrial precursor                                                     | 4 |
| 7.44  | 61.8 | IPI00230832 | 4 | Cox6c Cytochrome c oxidase polypeptide VIc-2                                                                   | 3 |
| 7.42  | 19.2 | IPI00212015 | 4 | Acadm Medium-chain specific acyl-CoA dehydrogenase, mitochondrial precursor                                    | 4 |
| 7.34  | 40.5 | IPI00232012 | 5 | RGD1563422_predicted Isoform Short of Brain protein 44                                                         | 4 |
| 7.27  | 28.1 | IPI00231901 | 4 | Casq2 calsequestrin 2                                                                                          | 4 |
| 7.22  | 46.9 | IPI00189203 | 4 | RGD1309529_predicted similar to Protein C10orf70                                                               | 4 |
| 6.92  | 22.5 | IPI00767473 | 3 | LOC684567 similar to ATP synthase, H <sup>+</sup> transporting, mitochondrial F0 complex, subunit f, isoform 2 | 4 |
| 6.86  | 51.7 | IPI00190161 | 3 | Ndufc2 Putative uncharacterized protein Ndufc2                                                                 | 4 |
| 6.59  | 28.5 | IPI00365149 | 3 | Polr2c;LOC498909 Ubiquinone biosynthesis protein COQ9, mitochondrial precursor                                 | 3 |
| 6.41  | 19.0 | IPI00192903 | 3 | Afg3l2 similar to AFG3-like protein 2                                                                          | 1 |
| 6.3   | 38.5 | IPI00326561 | 3 | Ech1 Delta(3,5)-Delta(2,4)-dienoyl-CoA isomerase, mitochondrial precursor                                      | 3 |

|      |      |             |   |                                                                                                            |   |
|------|------|-------------|---|------------------------------------------------------------------------------------------------------------|---|
| 6.21 | 35.7 | IPI00766356 | 3 | LOC684509 similar to NADH-ubiquinone oxidoreductase B9 subunit                                             | 2 |
| 6.2  | 19.5 | IPI00559060 | 3 | LOC311254 54 kDa protein                                                                                   | 3 |
| 6.12 | 31.7 | IPI00764083 | 2 | LOC683811 similar to Anionic trypsin II precursor                                                          | 1 |
| 6.08 | 37.9 | IPI00371518 | 4 | Sdhc Succinate dehydrogenase complex, subunit C, integral membrane protein                                 | 1 |
| 6.08 | 17.2 | IPI00851115 | 3 | Pccb Propionyl coenzyme A carboxylase, beta polypeptide                                                    | 2 |
| 6.02 | 34.2 | IPI00208215 | 3 | Prdx3 Thioredoxin-dependent peroxide reductase, mitochondrial precursor                                    | 4 |
| 6.02 | 33.6 | IPI00364850 | 4 | Ndufb6_predicted similar to NADH dehydrogenase (ubiquinone) 1 beta subcomplex, 6, 17kDa isoform 1          | 4 |
| 6.01 | 50.5 | IPI00191103 | 3 | Ndufa2_predicted similar to NADH dehydrogenase (ubiquinone) 1 alpha subcomplex, 2                          | 4 |
| 6    | 11.4 | IPI00470325 | 3 | RGD1303232 Probable oxidoreductase C10orf33 homolog                                                        | 2 |
| 6    | 38.5 | IPI00197369 | 3 | Ptges2_predicted similar to prostaglandin E synthase 2                                                     | 2 |
| 6    | 37.7 | IPI00760113 | 3 | Prdx5 Isoform Cytoplasmic+peroxisomal of Peroxiredoxin-5, mitochondrial precursor                          | 2 |
| 6    | 30.5 | IPI00561017 | 3 | Prdx5 22 kDa protein                                                                                       | 2 |
| 6    | 13.7 | IPI00734582 | 3 | Dnaja3 TID1                                                                                                | 3 |
| 5.92 | 21.6 | IPI00372796 | 4 | Mtch2_predicted similar to Mitochondrial carrier homolog 2                                                 | 4 |
| 5.82 | 21.3 | IPI00608138 | 4 | LOC360721 E2-induced gene 5 protein homolog                                                                | 2 |
| 5.81 | 24.8 | IPI00231028 | 3 | RGD1303003 ES1 protein homolog, mitochondrial precursor                                                    | 3 |
| 5.52 | 19.7 | IPI00211448 | 3 | Ehd2 EH-domain containing 2                                                                                | 2 |
| 5.31 | 46.3 | IPI00231192 | 3 | LOC689064;Hbb;MGC72973 Hemoglobin subunit beta-2                                                           | 1 |
| 5.3  | 30.1 | IPI00364390 |   | RGD1305677 Transmembrane protein 126A                                                                      | 2 |
| 5.3  | 30.9 | IPI00371036 | 3 | Fis1 Mitochondrial fission 1 protein                                                                       | 1 |
| 5.18 | 13.9 | IPI00193716 | 3 | Ivd Isovaleryl-CoA dehydrogenase, mitochondrial precursor                                                  | 1 |
| 5    | 15.2 | IPI00476550 | 3 | LOC687008 similar to Propionyl-CoA carboxylase alpha chain, mitochondrial precursor                        | 3 |
| 4.86 | 43.9 | IPI00382312 | 3 | Qpc Low molecular mass ubiquinone-binding protein                                                          | 4 |
| 4.63 | 25.2 | IPI00780411 | 4 | RGD1549725 Similar to RIKEN cDNA 9430083G14                                                                | 3 |
| 4.42 | 15.2 | IPI00370745 | 2 | Mtx2 Metaxin 2                                                                                             | 2 |
| 4.39 | 25.7 | IPI00197555 | 2 | Suclg1 Suclg1 protein                                                                                      | 1 |
| 4.34 | 16.0 | IPI00373418 | 2 | Dbt similar to Lipoamide acyltransferase component of branched-chain alpha-keto acid dehydrogenase complex | 2 |
| 4.34 | 8.5  | IPI00781829 | 3 | Cd36 Cd36 antigen                                                                                          | 1 |
| 4.3  | 74.5 | IPI00231411 | 2 | Atp5e ATP synthase epsilon chain, mitochondrial                                                            | 2 |
| 4.11 | 25.5 | IPI00189176 | 2 | Ndufa11 NADH dehydrogenase [ubiquinone] 1 alpha subcomplex subunit 11                                      | 4 |
| 4.07 | 18.6 | IPI00324633 | 2 | Glud1 Glutamate dehydrogenase 1, mitochondrial precursor                                                   | 3 |
| 4.06 | 23.9 | IPI00202658 | 2 | Hibadh 3-hydroxyisobutyrate dehydrogenase, mitochondrial precursor                                         | 1 |
| 4.05 | 19.1 | IPI00776749 | 2 | LOC360721 20 kDa protein                                                                                   | 1 |
| 4.04 | 43.1 | IPI00202111 | 2 | Usmg5 Up-regulated during skeletal muscle growth protein 5                                                 | 3 |
| 4.03 | 31.7 | IPI00230775 | 2 | MGC109519 Isoform 1 of Tropomyosin beta chain                                                              | 1 |
| 4.01 | 21.8 | IPI00766169 | 2 | LOC687295 similar to translocase of inner mitochondrial membrane 50 homolog isoform 2                      | 2 |
| 4.01 | 14.4 | IPI00556921 | 2 | LOC683013 Fatty acid transport protein                                                                     | 1 |
| 4.01 | 18.7 | IPI00760152 | 2 | Cyb5r3 Isoform 3 of NADH-cytochrome b5 reductase 3                                                         | 2 |
| 4.01 | 17.8 | IPI00566692 | 2 | - 20 kDa protein                                                                                           | 3 |
| 4    | 23.8 | IPI00780763 | 2 | Tnnt2 34 kDa protein                                                                                       | 1 |
| 4    | 21.4 | IPI00817099 | 2 | Synj2bp outer membrane protein                                                                             | 1 |
| 4    | 21.5 | IPI00203528 | 2 | Stoml2 Stomatin-like protein 2                                                                             | 1 |
| 4    | 59.1 | IPI00782248 | 2 | Sdhc 14 kDa protein                                                                                        | 1 |
| 4    | 14.8 | IPI00763638 | 2 | RGD1565355_predicted Cd36 protein                                                                          | 1 |
| 4    | 16.5 | IPI00766819 | 2 | RGD1563224_predicted RGD1563224_predicted protein                                                          | 1 |
| 4    | 16.6 | IPI00208203 | 2 | Peci Peroxisomal delta3, delta2-enoyl-Coenzyme A isomerase                                                 | 1 |
| 4    | 18.3 | IPI00734576 | 3 | mt-Nd3 NADH dehydrogenase subunit 3                                                                        | 1 |
| 4    | 26.1 | IPI00287835 | 2 | Hba-a1 Hemoglobin subunit alpha-1/2                                                                        | 1 |
| 4    | 23.7 | IPI00207933 | 2 | Dhrs4 dehydrogenase/reductase (SDR family) member 4                                                        | 1 |
| 4    | 7.4  | IPI00360158 | 2 | Crat Carnitine O-acetyltransferase                                                                         | 3 |
| 4    | 15.9 | IPI00365505 | 2 | Cox7a2l_predicted similar to cytochrome c oxidase subunit VIIa polypeptide 2-like                          | 3 |
| 4    | 39.6 | IPI00231955 | 2 | Calm1;Calm2;Calm3 Calmodulin                                                                               | 2 |

|      |      |             |   |                                                                                        |   |
|------|------|-------------|---|----------------------------------------------------------------------------------------|---|
| 4    | 9.6  | IPI00555310 | 2 | Cabc1;Psen2 Chaperone activity of bc1 complex-like, mitochondrial precursor            | 1 |
| 4    | 10.7 | IPI00778633 | 2 | ApoH Apolipoprotein H                                                                  | 1 |
| 3.79 | 36.0 | IPI00192313 | 2 | Cav Isoform Alpha of Caveolin-1                                                        | 2 |
| 3.75 | 14.9 | IPI00734731 | 9 | mt-Nd5 NADH dehydrogenase subunit 5                                                    | 2 |
| 3.74 | 33.3 | IPI00326433 | 2 | Hspe1 10 kDa heat shock protein, mitochondrial                                         | 1 |
| 3.72 | 24.5 | IPI00382330 | 2 | LOC311254 Ac1164                                                                       | 1 |
| 3.7  | 9.7  | IPI00557984 | 2 | RGD1305387 54 kDa protein                                                              | 2 |
| 3.7  | 22.0 | IPI00362243 | 2 | Ak3 GTP:AMP phosphotransferase mitochondrial                                           | 1 |
| 3.53 | 17.9 | IPI00361686 | 2 | C1qbp Complement component 1 Q subcomponent-binding protein, mitochondrial precursor   | 1 |
| 3.52 | 46.5 | IPI00417749 | 2 | Tomm22 TOM22                                                                           | 2 |
| 3.52 | 6.6  | IPI00780929 | 2 | Peci 35 kDa protein                                                                    | 1 |
| 3.52 | 37.5 | IPI00764950 | 2 | LOC683838 similar to ubiquinol-cytochrome c reductase complex 7.2kDa protein isoform a | 4 |
| 3.47 | 27.6 | IPI00568277 | 2 | - 11 kDa protein                                                                       | 1 |
| 3.33 | 23.7 | IPI00769072 | 2 | Ahnak similar to AHNAK nucleoprotein isoform 1 isoform 2                               | 1 |
| 3.17 | 30.3 | IPI00358015 | 2 | Ndufb3_predicted similar to NADH dehydrogenase (ubiquinone) 1 beta subcomplex 3        | 2 |
| 3.16 | 35.8 | IPI00195772 | 2 | mt-Atp8 ATP synthase protein 8                                                         | 1 |
| 3.05 | 10.9 | IPI00560078 | 2 | Bsg 30 kDa protein                                                                     | 1 |
| 2.92 | 4.8  | IPI00764376 | 2 | Afg3l2 similar to AFG3-like protein 2                                                  | 1 |
| 2.7  | 5.9  | IPI00557163 | 2 | Srl_predicted similar to sarcalumenin                                                  | 1 |
| 2.29 | 13.8 | IPI00209113 | 2 | Myh9 Myosin-9                                                                          | 1 |
| 2.27 | 10.3 | IPI00327834 | 2 | Pdk2 [Pyruvate dehydrogenase [lipoamide]] kinase isozyme 2, mitochondrial precursor    | 1 |
