# Supplementary material
Source: PubMed Central journal article supplement (PMC2711746)
Supplement: 01278.2008_2.pdf [file 01278.2008_2.pdf]

**Supplemental Table 2.** Cardiac mitochondrial proteins identified showing a significant ( $p < 0.05$ ) difference between groups. 114 = IMF mitochondria isolated from sedentary animals; 115 = IMF mitochondria isolated from exercise trained animals; 116 = SS mitochondria isolated from sedentary animals; 117 = SS mitochondria isolated from exercise trained animals. The number of spectrum used for quantification of each protein in each replicate is also indicated.

| Accession # | Protein Name                                                                                                                    | Rep 1        |         |         |         |         |         |         | Rep 2        |         |         |         |         |         |         |
|-------------|---------------------------------------------------------------------------------------------------------------------------------|--------------|---------|---------|---------|---------|---------|---------|--------------|---------|---------|---------|---------|---------|---------|
|             |                                                                                                                                 | # Q spectrum | 116/114 | P value | 115/114 | P value | 117/116 | P value | # Q spectrum | 116/114 | P value | 115/114 | P value | 117/116 | P value |
| IPI00201413 | Acaa2 3-ketoacyl-CoA thiolase, mitochondrial                                                                                    | 6            | ---     | ---     | 1.86    | 4.2E-02 | ---     | ---     | 6            | 1.60    | 2.5E-02 | ---     | ---     | ---     | ---     |
| IPI00211225 | Acadl Long-chain specific acyl-CoA dehydrogenase, mitochondrial precursor                                                       | 16           | ---     | ---     | 1.81    | 7.7E-06 | -1.29   | 4.1E-05 | 23           | ---     | ---     | 1.30    | 2.4E-03 | ---     | ---     |
| IPI00205018 | Aldh6a1 Methylmalonate-semialdehyde dehydrogenase [acylating], mitochondrial precursor                                          | 6            | ---     | ---     | ---     | ---     | 1.33    | 1.7E-02 | 9            | ---     | ---     | 1.34    | 2.2E-02 | 1.29    | 5.4E-03 |
| IPI00195123 | Atp5o ATP synthase O subunit, mitochondrial precursor                                                                           | 47           | ---     | ---     | ---     | ---     | ---     | ---     | 41           | ---     | ---     | -1.32   | 2.1E-02 | ---     | ---     |
| IPI00372027 | Chchd3_predicted similar to coiled-coil-helix-coiled-coil-helix domain containing 3                                             | 4            | ---     | ---     | -2.27   | 3.8E-03 | ---     | ---     | 5            | 2.03    | 3.8E-02 | -2.40   | 2.6E-02 | ---     | ---     |
| IPI00206977 | Cs Citrate synthase, mitochondrial precursor                                                                                    | 12           | ---     | ---     | 1.71    | 3.7E-03 | ---     | ---     | 15           | ---     | ---     | 1.50    | 1.6E-02 | 1.29    | 4.3E-04 |
| IPI00765153 | Dlat similar to dihydroliipoamide S-acetyltransferase                                                                           | 15           | 1.99    | 1.4E-02 | ---     | ---     | -1.51   | 4.1E-06 | 12           | ---     | ---     | ---     | ---     | ---     | ---     |
| IPI00551702 | Dlst Dihydroliipoalysine-residue succinyltransferase component of 2-oxoglutarate dehydrogenase complex, mitochondrial precursor | 8            | 1.71    | 7.1E-03 | ---     | ---     | -1.43   | 2.6E-05 | 8            | ---     | ---     | ---     | ---     | ---     | ---     |
| IPI00326561 | Ech1 Delta(3,5)-Delta(2,4)-dienoyl-CoA isomerase, mitochondrial precursor                                                       | 3            | ---     | ---     | 2.31    | 2.1E-04 | ---     | ---     | 3            | ---     | ---     | 2.00    | 6.9E-03 | 1.39    | 7.9E-03 |
| IPI00210920 | Got2 Aspartate aminotransferase, mitochondrial precursor                                                                        | 14           | -1.24   | 9.4E-03 | ---     | ---     | 1.15    | 3.5E-02 | 16           | ---     | ---     | 1.39    | 3.5E-02 | 1.24    | 1.7E-03 |
| IPI00212622 | Hadha Trifunctional enzyme subunit alpha, mitochondrial precursor                                                               | 22           | 1.67    | 4.9E-02 | ---     | ---     | 1.27    | 8.6E-05 | 30           | 1.80    | 6.3E-03 | ---     | ---     | 1.21    | 4.4E-04 |
| IPI00205157 | Hadhsc Hydroxyacyl-coenzyme A dehydrogenase, mitochondrial precursor                                                            | 6            | -1.35   | 7.2E-03 | 1.51    | 9.6E-03 | ---     | ---     | 4            | -1.45   | 4.2E-02 | ---     | ---     | ---     | ---     |
| IPI00363265 | Hspa9a_predicted Stress-70 protein, mitochondrial precursor                                                                     | 11           | 1.72    | 2.2E-02 | ---     | ---     | ---     | ---     | 10           | 1.57    | 4.9E-02 | ---     | ---     | ---     | ---     |
| IPI00193716 | Ivd Isovaleryl-CoA dehydrogenase, mitochondrial precursor                                                                       | 6            | -1.46   | 1.1E-03 | 2.09    | 1.3E-03 | ---     | ---     | 5            | -2.07   | 2.4E-03 | ---     | ---     | ---     | ---     |
| IPI00215093 | LOC360975 2-oxoglutarate dehydrogenase E1 component, mitochondrial precursor                                                    | 23           | 1.71    | 4.0E-04 | ---     | ---     | -1.41   | 2.5E-07 | 25           | 1.37    | 1.5E-02 | ---     | ---     | ---     | ---     |
| IPI00202238 | LOC681867;LOC681418 similar to NADH-ubiquinone oxidoreductase PDSW subunit (Complex I-PDSW) (CI-PDSW) isoform 1                 | 11           | -1.35   | 1.7E-02 | ---     | ---     | 1.18    | 1.4E-02 | 9            | ---     | ---     | ---     | ---     | ---     | ---     |
| IPI00362298 | LOC690675;LOC684936 similar to Cytochrome c, somatic                                                                            | 16           | -1.61   | 1.4E-04 | ---     | ---     | ---     | ---     | 16           | -1.30   | 5.6E-05 | ---     | ---     | 1.21    | 9.7E-03 |
| IPI00202370 | Maoa similar to Amine oxidase [flavin-containing] A                                                                             | 20           | ---     | ---     | -4.14   | 5.4E-07 | -3.58   | 2.9E-15 | 14           | ---     | ---     | -2.83   | 2.7E-07 | -1.10   | 3.3E-02 |
| IPI00197696 | Mdh2 Malate dehydrogenase, mitochondrial precursor                                                                              | 26           | ---     | ---     | ---     | ---     | ---     | ---     | 28           | -1.41   | 6.6E-04 | ---     | ---     | ---     | ---     |
| IPI00231997 | Ndufa5 NADH dehydrogenase [ubiquinone] 1 alpha subcomplex subunit 5                                                             | 10           | ---     | ---     | ---     | ---     | 1.13    | 3.5E-02 | 8            | ---     | ---     | ---     | ---     | ---     | ---     |
| IPI00204118 | Pdcd8 Apoptosis-inducing factor 1, mitochondrial precursor                                                                      | 7            | 2.30    | 8.3E-03 | ---     | ---     | ---     | ---     | 8            | 2.19    | 8.6E-04 | ---     | ---     | ---     | ---     |
| IPI00208215 | Prdx3 Thioredoxin-dependent peroxide reductase, mitochondrial precursor                                                         | 4            | ---     | ---     | ---     | ---     | ---     | ---     | 4            | ---     | ---     | 1.32    | 2.1E-02 | 1.40    | 1.2E-02 |

| Accession # | Protein Name                                                                                                                    | Rep 3        |         |         |         |         |         |         | Rep 4        |         |         |         |         |         |         |
|-------------|---------------------------------------------------------------------------------------------------------------------------------|--------------|---------|---------|---------|---------|---------|---------|--------------|---------|---------|---------|---------|---------|---------|
|             |                                                                                                                                 | # Q spectrum | 116/114 | P value | 115/114 | P value | 117/116 | P value | # Q spectrum | 116/114 | P value | 115/114 | P value | 117/116 | P value |
| IPI00201413 | Acaa2 3-ketoacyl-CoA thiolase, mitochondrial                                                                                    | 7            | 1.85    | 2.2E-05 | ---     | ---     | ---     | ---     | 7            | ---     | ---     | ---     | ---     | -1.28   | 8.0E-03 |
| IPI00211225 | Acadl Long-chain specific acyl-CoA dehydrogenase, mitochondrial precursor                                                       | 20           | ---     | ---     | 1.53    | 2.6E-05 | -1.15   | 2.0E-02 | 18           | ---     | ---     | ---     | ---     | -1.36   | 3.8E-04 |
| IPI00205018 | Aldh6a1 Methylmalonate-semialdehyde dehydrogenase [acylating], mitochondrial precursor                                          | 5            | ---     | ---     | 1.56    | 1.1E-02 | 1.40    | 1.5E-02 | 4            | ---     | ---     | ---     | ---     | ---     | ---     |
| IPI00195123 | Atp5o ATP synthase O subunit, mitochondrial precursor                                                                           | 29           | ---     | ---     | -1.56   | 2.4E-02 | ---     | ---     | 34           | ---     | ---     | -1.39   | 1.2E-02 | ---     | ---     |
| IPI00372027 | Chchd3_predicted similar to coiled-coil-helix-coiled-coil-helix domain containing 3                                             | 2            | ---     | ---     | ---     | ---     | ---     | ---     | 2            | ---     | ---     | ---     | ---     | ---     | ---     |
| IPI00206977 | Cs Citrate synthase, mitochondrial precursor                                                                                    | 7            | ---     | ---     | 1.68    | 1.8E-03 | ---     | ---     | 9            | ---     | ---     | 1.39    | 3.5E-02 | ---     | ---     |
| IPI00765153 | Dlat similar to dihydrolipoamide S-acetyltransferase                                                                            | 7            | 2.25    | 4.3E-03 | ---     | ---     | ---     | ---     | 11           | ---     | ---     | ---     | ---     | ---     | ---     |
| IPI00551702 | Dlst Dihydrolipoyllysine-residue succinyltransferase component of 2-oxoglutarate dehydrogenase complex, mitochondrial precursor | 5            | 1.88    | 1.4E-02 | ---     | ---     | ---     | ---     | 4            | ---     | ---     | ---     | ---     | ---     | ---     |
| IPI00326561 | Ech1 Delta(3,5)-Delta(2,4)-dienoyl-CoA isomerase, mitochondrial precursor                                                       | 0            | ---     | ---     | ---     | ---     | ---     | ---     | 2            | ---     | ---     | ---     | ---     | ---     | ---     |
| IPI00210920 | Got2 Aspartate aminotransferase, mitochondrial precursor                                                                        | 9            | ---     | ---     | ---     | ---     | ---     | ---     | 11           | ---     | ---     | 1.46    | 3.3E-02 | ---     | ---     |
| IPI00212622 | Hadha Trifunctional enzyme subunit alpha, mitochondrial precursor                                                               | 19           | 1.79    | 1.3E-02 | -1.60   | 2.5E-02 | ---     | ---     | 21           | ---     | ---     | -1.45   | 2.3E-02 | 1.17    | 4.0E-02 |
| IPI00205157 | Hadhsc Hydroxyacyl-coenzyme A dehydrogenase, mitochondrial precursor                                                            | 3            | ---     | ---     | 1.94    | 3.3E-03 | -1.20   | 1.3E-02 | 3            | ---     | ---     | ---     | ---     | ---     | ---     |
| IPI00363265 | Hspa9a_predicted Stress-70 protein, mitochondrial precursor                                                                     | 8            | 2.06    | 1.3E-02 | ---     | ---     | ---     | ---     | 10           | 1.36    | 4.3E-02 | ---     | ---     | ---     | ---     |
| IPI00193716 | Ivd Isovaleryl-CoA dehydrogenase, mitochondrial precursor                                                                       | 0            | ---     | ---     | ---     | ---     | ---     | ---     | 3            | -2.90   | 8.5E-03 | ---     | ---     | ---     | ---     |
| IPI00215093 | LOC360975 2-oxoglutarate dehydrogenase E1 component, mitochondrial precursor                                                    | 18           | 1.87    | 1.6E-03 | ---     | ---     | ---     | ---     | 19           | 1.42    | 2.7E-02 | ---     | ---     | ---     | ---     |
| IPI00202238 | LOC681867;LOC681418 similar to NADH-ubiquinone oxidoreductase PDSW subunit (Complex I-PDSW) (CI-PDSW) isoform 1                 | 7            | -1.64   | 5.5E-03 | ---     | ---     | 1.40    | 5.4E-03 | 12           | -1.39   | 4.1E-02 | ---     | ---     | ---     | ---     |
| IPI00362298 | LOC690675;LOC684936 similar to Cytochrome c, somatic                                                                            | 9            | ---     | ---     | 1.58    | 7.2E-03 | ---     | ---     | 26           | ---     | ---     | ---     | ---     | 1.24    | 1.2E-06 |
| IPI00202370 | Maoa similar to Amine oxidase [flavin-containing] A                                                                             | 8            | ---     | ---     | 1.66    | 3.1E-03 | ---     | ---     | 19           | ---     | ---     | ---     | ---     | -1.34   | 1.4E-05 |
| IPI00197696 | Mdh2 Malate dehydrogenase, mitochondrial precursor                                                                              | 19           | ---     | ---     | 1.66    | 5.5E-03 | ---     | ---     | 22           | ---     | ---     | 1.29    | 2.7E-02 | ---     | ---     |
| IPI00231997 | Ndufa5 NADH dehydrogenase [ubiquinone] 1 alpha subcomplex subunit 5                                                             | 3            | -1.77   | 7.6E-03 | ---     | ---     | 1.48    | 1.9E-02 | 7            | -1.71   | 4.2E-02 | ---     | ---     | 1.36    | 4.1E-02 |
| IPI00204118 | Pdcd8 Apoptosis-inducing factor 1, mitochondrial precursor                                                                      | 6            | ---     | ---     | ---     | ---     | ---     | ---     | 5            | ---     | ---     | ---     | ---     | ---     | ---     |
| IPI00208215 | Prdx3 Thioredoxin-dependent peroxide reductase, mitochondrial precursor                                                         | 3            | ---     | ---     | ---     | ---     | 1.40    | 7.2E-03 | 3            | ---     | ---     | ---     | ---     | ---     | ---     |
